# Supplementary material for: Functional characterization and regulatory mechanism of wheat CPK34 kinase in response to drought stress
Source: PubMed Central journal article supplement (PMC7444251; doi:10.1186/s12864-020-06985-1), 2020-08-24
Supplement: 12864_2020_6985_MOESM1_ESM.pdf [file 12864_2020_6985_MOESM1_ESM.pdf]

|            |                                                                              |     |
|------------|------------------------------------------------------------------------------|-----|
| TuCPK34    | MALKFLRSRMFLMEDHTGVIKY....RQTM                                               | 29  |
| CS-TaCPK34 | MGNCCAGSGDAEPEAAAADPSTRRAGASVQAGGASPPSAPAQNKPAAIGFVLRGPMEDVRSIYTVGKELGRGQFG  | 75  |
| TuCPK34    | VIEEKYILATGQKFACTIAKRKLSTKEDVEDVRREVQIMYHLAGQPNIVELKGAYEDKQSVHLVMELCAGGELF   | 104 |
| CS-TaCPK34 | ITSLCTHRATGQKFACTIAKRKLSTKEDVEDVRREVQIMYHLAGQPNIVELKGAYEDKQSVHLVMELCAGGELF   | 150 |
| TuCPK34    | DRIIAKGKYTERAAAALLRTIVEIIHTCHSLGVIHRDLKPENFLLLSKEEDAPLKATDFGLSVFYKQGTTHACIYL | 179 |
| CS-TaCPK34 | DRIIAKGKYTERAAAALLRTIVEIIHTCHSLGVIHRDLKPENFLLLSKEEDAPLKATDFGLSVFYKQGE...VFK  | 222 |
| TuCPK34    | LLLSRPSKIANETASFRCSRKNSGAIVGRGGVQGHGQRLHRAGESEHGIFNSILRGQIDFSSDPWPRISSGA     | 254 |
| CS-TaCPK34 | DIVGSAYYIAPFVLRKRYGPEADIWSGVIVYILLG...VPPFWAEESEHGIFNSILRGQIDFSSDPWPRISPGA   | 294 |
| TuCPK34    | KDLVRKMLNSDPKKRISAYDVLNHPWIKEDGEAPDTPLDNAVMNRLKQFKAMNQFKAALRVIAGCLSEEEIRGL   | 329 |
| CS-TaCPK34 | KDLVRKMLNSDPKKRISAYDVLNHPWIKEDGEAPDTPLDNAVMNRLKQFKAMNQFKAALRVIAGCLSEEEIRGL   | 369 |
| TuCPK34    | KEMFKSMDSDNSGTITVDELKGLGKQTKLTEAEVEQLMEAADADGSGTIDYDEFITATMNMNRMDREEHLYTA    | 404 |
| CS-TaCPK34 | KEMFKSMDSDNSGTITVDELKGLGKQTKLTEAEVEQLMEAADADGSGTIDYDEFITATMNMNRMDREEHLYTA    | 444 |
| TuCPK34    | FQYFDKNSGYISKEELEQALREKGLLDGRDMSIEIVSEVDADNDGRIDYSEFVAMMRKGAPEGANPKRRDVVL    | 478 |
| CS-TaCPK34 | FQYFDKNSGYISKEELEQALREKGLLDGRDMSIEIVSEVDADNDGRIDYSEFVAMMRKGAPEGANPKRRDVVL    | 518 |

**Supplemental Figure S1.** Amino acid sequence alignment between TuCPK34 (EMS58754) in *Triticum urartu* and TaCPK34 in *Chinese Spring* (CS-TaCPK34).

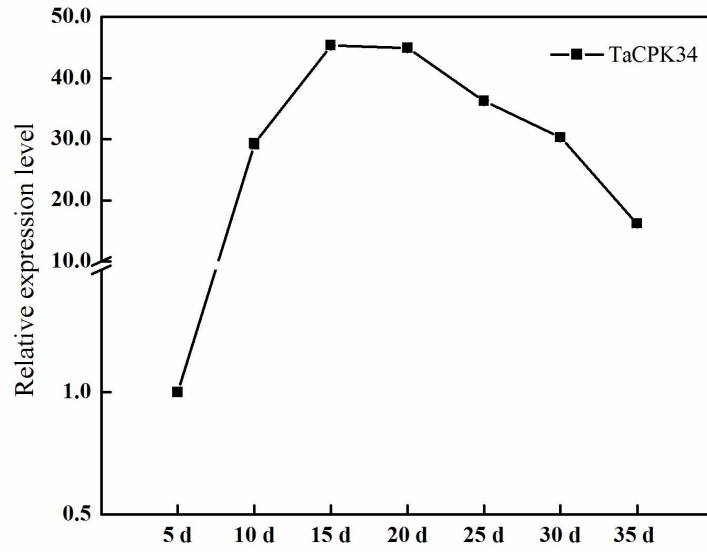

**Supplemental Figure S2.** Abundance of TaCPK34 protein in wheat grains after anthesis. Notes: expression level of TaCPK34 protein at 5 day after anthesis is acted as control (value=1.0) to calculate its expression levels at other sampling timepoints (10, 15, 20, 25, 30, and 35 days after anthesis). Each value is the mean  $\pm$  standard deviation of at least three independent measurements.

|             |                                                                              |     |
|-------------|------------------------------------------------------------------------------|-----|
| TaCPK34-3AL | GACCGGATCATCGCCAAGGGCAAATACACGGAGCGCGCCGCCGGCCCTGCTCCGCACCATCGTCGAGATCATC    | 525 |
| TaCPK34-3B  | GACCGGATCATCGCCAAGGGCAAATACACGGAGCGCGCCGCCGAGCCCTGCTCCGCACCATCGTCGAGATCATC   | 525 |
| TaCPK34-3DL | GACCGGATCATCGCCAAGGGCAAATACACGGAGCGCGCCGCCGATCCCTGCTCCGCACCATCGTCGAGATCATC   | 525 |
| TaCPK34-3AL | CACACCTGCCACTCCCTCGGCGTCATCCACCGCGAOCCTCAAGCCCGAGAACTTCCTCCTGCTCAGCAAGGAGGAG | 600 |
| TaCPK34-3B  | CACACCTGCCACTCCCTCGGCGTCATCCACCGCGAOCCTCAAGCCCGAGAACTTCCTCCTGCTCAGCAAGGAGGAG | 600 |
| TaCPK34-3DL | CACACCTGCCACTCCCTCGGCGTCATCCACCGCGAOCCTCAAGCCCGAGAACTTCCTCCTGCTCAGCAAGGAGGAG | 600 |
| TaCPK34-3AL | GACGCGCCGCTCAAGGCCACCGACTTCGGGCTATCCGTCTTCTACAAGCAAGGGGAGGTGTTCAAGGACATCGTG  | 675 |
| TaCPK34-3B  | GACGCGCCGCTCAAGGCCACCGACTTCGGGCTATCCGTCTTCTACAAGCAAGGGGAGGTGTTCAAGGACATCGTG  | 675 |
| TaCPK34-3DL | GACGCGCCGCTCAAGGCCACCGACTTCGGGCTATCCGTCTTCTACAAGCAAGGGGAGGTGTTCAAGGACATCGTG  | 675 |
| TaCPK34-3AL | GGCAGCGCCTACTACATCGCGCCGGAGGTCTGAAGCGGAACCTACGGGCCGGAGGCGGACATCTGGAGCGTCGGC  | 750 |
| TaCPK34-3B  | GGCAGCGCCTACTACATCGCGCCGGAGGTCTGAAGCGGAACCTACGGGCCGGAGGCGGACATCTGGAGCGTCGGC  | 750 |
| TaCPK34-3DL | GGCAGCGCCTACTACATCGCGCCGGAGGTCTGAAGCGGAACCTACGGGCCGGAGGCGGACATCTGGAGCGTCGGC  | 750 |

**Supplemental Figure S3.** The location of silenced gene-specific fragment in full-length of the *TaCPK34* gene.

Notes: Length of the selected fragment is 219 bp (from +505 to +723, the translation start site “ATG” is +1).

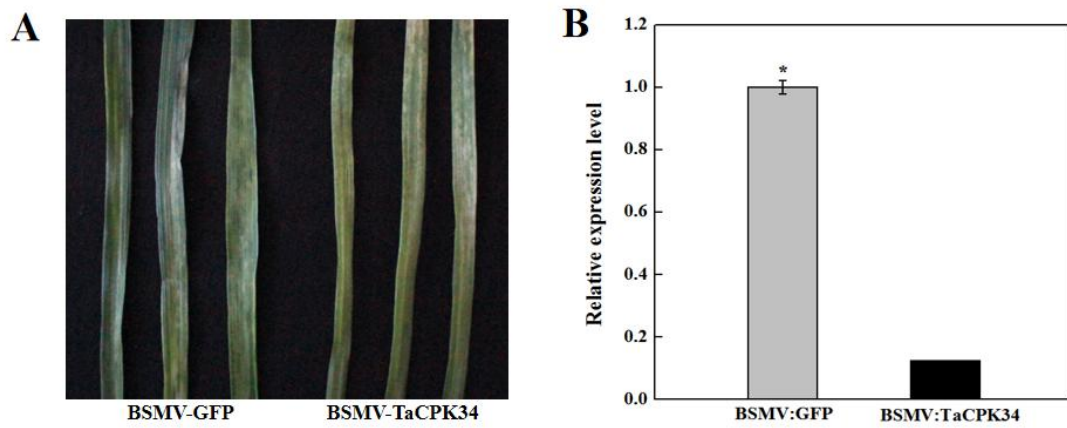

**Supplemental Figure S4.** BSMV-VIGS-mediated silencing of the *TaCPK34* gene. A, Phenotype of the fourth leaves of BSMV-VIGS-TaCPK34- or BSMV-VIGS-GFP-inoculated wheat seedlings; B, Transcripts of the *TaCPK34* gene in leaves of these two treatments. Transcripts were determined by qPCR using the *TaActin* gene as the internal control. Each value is the mean  $\pm$  standard deviation of at least three independent measurements. Asterisks indicate statistically significant differences ( $P < 0.05$ ).

Dehydrin DHN2 (NCBI accession no. XP\_020155660.1; IWGSC accession no. TraesCS5A02G369800.1)

AGGCGGTGTTGTGGATCCGGTGACAGTAGTAGATTGGGATTCCTCTGTAAATTAGGGTTGCTAAGTCGCGGGCGCATTGACCATTGGCTATG  
GTGGCGGCGACACTCCATGTCTCGTCCGGGTAGCAAGGCAGGGCGATGTCGCCGAGCCAGAATAATGTCATTCTCGCCTTATCTTCGCA  
CCAGTGGTGCCTTTAGCACCTCGAAGGG**CACGTG**AAGGTGTGTCTCAAACCTAGATCCAAACATATACACATTCTCACAAGTTGATAATAT  
TTCAAACATATAAAGGACAAAAAGAAATTAACGTAATCTTAGATGAAACAGACGTTGCAAGCATGTCTTTGGTTTGATCATTTGAAACGTC  
GAGCATGTTGACCAAAATGTTGTATGTGACACTCTCTCTCCCTCTCTCTGCAACATGGCTGCCGGATGCTTTCCGTGCCAACTCATTTC  
TCTTTAGTTTCATGTCTAGATGTACAAGCAATAATGCAATACATTTTCAAGATAAATAAAGTTGAGTAAATGCATCGTTGTTAATGGA  
AGGATGGATGTAATGCATTGACCTTCCCCGATAATATATCTTTGATTCGGAATGTTGGCGGCACTAGCTTAGCCATTTAAAAACATTATCT  
ATCTAAATATCTTTAAAAATACAATAATCCATCAATAATCAGAATGTGCCAACCAACAGTATATATAGAGACAACATTGATAACGAGTTA  
TGAGCTTCGATCTACAAAGATTGCATGGAGATAGAGTTGATGGAGATGGTTTATGGCACCATTATGTCCACAAGTGTTCATAGTATATGA  
TGAATTTAGCATCTCTATTTCCACATTTCTGTCAACCTTTCTCTTCTCACTCTATTTTTGGAGACATATTTTATGATGGAAGGTGGAGTGT  
CGATTTCCGCTTCCAGCAGCACTTGATTGGCTTGTAGAGTGTGCATGATAAGACATAGATCACTAGTGGTGGAGCTTCATATGTTAGAGATA  
CGACACAAATCGAACACGATGAAGAACGAAACCAAGCAAGGGATACGGGATTTTAAATGTGAAAACCCCTTTAACACGAAACGAGAAAAAC  
CAAGGACGCCAGCCAGACAAACTTCACTGTATCAGAGGAGTTTAAACCTCAGGAATTTACAGCCGATCAATTTATCTGTCAGTGGCTTA  
CAAAACCCACCCCTTCCCCCCCCACCCCAAGCGTCCCTGTGCGGGGCGAGCCACATGGGTAACTTTAGCCCAAGCCTACCAGCGC  
ACCGCTCGCTTCAAAGCTAGCCTTTTCTCTTTATACCTTGTATGCTTCCAAGAGGCAAAAGTTATATCGGATGCCAGGGGCGAGAGGCCAA  
CGGTTAAGACTGGGTAGGCCACGGACGAGGAACCGTTGCGCACAAAGGAAGAGGAAAGAGAGGAAAGATGTACACTGGTCTGTCTTAGC  
CGTTGGAAGAAGATCCAGCGGTCCCCAAAAAAGGACCTACGCAAAAGATATTTTCAAAGATAACGGGCGCTTGTAGTAGAACACATATTTTC  
CAGTTATCAACCCAGCTGTCTGCTAACGCAATAACTAGACGTACATGTGATTGATACAAAACCTTTACAGTTGAAACCTGGCCCTCATCT  
AATTTGCCCTTGAATTTTTCATGGATGGGCCACCCCTTCTAATTAATCTCTGCAATCACAGCCCATCAGCCCTTAAACTCCCCGTAACCT  
CGTGTACGTGTAGCATGTCTCTGCTAACGTGTACCACTACTATTCATGCATATGCATGCGTAGATGGAGGAGTCACTGCCCTTCGAGAGAGT  
GCGAAGCCCTACGTGCCCGCCGACGAGCCGAGTGGCTTTGTATATTTGGCGGATGACCACCTCCACGCACTTGTACTGGTGTCACTGTGC  
TTCTCGAAGTCGAAACCTGGACCATTCTGAGACCTATAAATAGCCACCTGAGTGCACCTTGGCTGCATCGCAACCCGAGCAGTTCAACA  
CTTACACAGCCATACACATCACCTGTAGATCGACCGGTGTCTTACCGGAC**GATG**

LEA3 protein (NCBI accession no. ALD18912.1; IWGSC accession no. TraesCS1B02G381200.1)

GAAAACACAACATTTGTTAAAAATATTTTGTACTCCCGAACAAAATTTGAAATATGTGAACACATTTTGAATGGGAACATTTTACGAA  
ACTCGCGAACAAAAATTTAAAAACAACACATTTTGTGAAATTTGTGAACAAAATTTGAAATAGGAACATTTGTTGAAACTCACAAACAAA  
ATGAAATATGAACATTTTATTAATATGCAAAACAAATTTGCAAAAGTTGTGAAATTTTGAACAAAACATAAAGAAAAGAAACAGAAACAG  
AAAGTAAAAAGGTAATAAACAGAAAAGGAAAAAAGAAATAGAAAACAATAGAAAAGCCGAAAAGAACAGAGAAAACGATACAGGAAAAAC  
CCGGTTCAGGAACCTTCTAGAAGTTCCCAAAACCGGTTGAGTGGGCGGCCATGTCTTTGGCTCGCTGGCTCCTATGTGGCGTTCTCT  
GTGTGATTGCTCGACAGTTCCCGCAGCGAGGCGCAATAGGATTTTCCGTGTTGCGGCCGGGAAATATGTCTCACATACTGTGCTCGCTTC  
TGGAGCTCCTCTAACCGGCTGGCCCATCATTTGTAGATCATGTGCGTTTTCGGAAGGTTCTGTGGTCTGGTTCCAGACCTGTTTGTAGA  
ACCTCATTTGTTTCTTCTTCTTATATATGTGTTTTTATCTCGATCCCTTACTTTCACAGTTTGTTCATTTTTCACACACATATCT  
CTTTTCCAATACACATTTGATACATATTCAGAATACATGATGTACGTTTTTCAAAATGCATGTTTTGAAAAGCTTTTGAATACATCTTAAACAT  
TGTTGATACACTTTGAAAATAATTTAATGGCATTAACTATTTTCTAAACTACGCAAGATATTTTAAATGTCAGAACATTTTGAAAAAC  
ACGGAACATTCATTTAAATATGAAGTATATTTGTTGAATGATATGAAACATTTTGTATTTACATGGTATGAACATTTTCTAAATATGGC  
ACACATTTTATGAATGATATCAACATTTTATAAAAAGTTGTGCAAAATAGTTTTTATACTGCATGAATATTTTCATGTGGGATGAACATTTT  
AAAAAATGAAGTAAATTTTATTTGGAAGACGCAAGTAAAAAATAATACGATCCGCTTGGAAAGCTAGGGCTCTTCTTGCAGGGCCCA  
CTTCATCTAGGCCATTTCCGACATCCTTGAGACGGAGGTTCTTCACTCCTACAGCTAGACAAAGACGCGCAATGCCCGCGTAAAAA  
AAAAAAAAGATGCGCAATGCGTTGAGCTTCAAAATATTTTCTTCTTGGTTATAAAACGCGAGATTTCCGAGCGAACGTACGGTGAAT  
TTTCTACCCGCTGTCAACGCTGCTACTTCTGGATGAAGAAGCGTCCGATCTCATCGAGTGGAGCGACGTTGCGTTGTTTATTCGCTTGTCT  
CCTTTTGGGTAAAGACAGGCATCG**CACGTG**ACACCCGCGCAGCAACAAATACACCGAGAGAAAAACACACGTCGATGGATCATCAG  
AGATGCCGATGCACATGGCGGCGACGATGGCGTGCATGCTCCACCGCACCGCCACCAAGTTGCAACCTCGCAGCCAGAGAGCCGCATC  
CAACTTGTGCTCGCTCGCCACCGCTTACACTTGTATTATTCAGCTTCTTCCGCCCTTTTGGCTCTTCTTCTCCGGCATGGGCT  
CGATCGAATCGGTTCCATCTACATGGCAGCTTCCGAAAGTACCGTCCGAGGAGCGGCAACGCGTGTCTTCCCTACGTGGCGCCATGTAC  
GAGCACCCGCGCAACGTGGCTCATAGCTTCTGCTACAAAGGCCACTGCTCCGTGCTCCTCACCATATCAAGAAGCCGATCCATTTCC  
AAGCACAGTCGAGCAGAAGCCTAAAGCGAGTGACATTTCCCTTCCGAGCTAGCTCAAGAAACCAAT**ATG**

Low-temperature-induced 65 kDa protein-like isoform X1 (NCBI accession no. XP\_020162307.1; IWGSC accession no. TraesCS1D02G163800.2)

GGCGACTTGGAGAAAGGAAAAATGGTGGTGCATGATAGCCTCCCGTTATACACACAAGGAAAGTGCCCAAGCCGGAGTTGCATGGACCCC  
TCCTCCACCGGGGTAGGCTAAGCTCAATACAGATGGCAGCCATGTCCTCCAACAGAGAGGCGGGGTGCTATGATTTCTCGTGTATGATAG  
AGGCAACATCATCTATAGCTTGTAGACAGCTCCTTACGTGCGATAATGGCTTGAAGCAGAGCTGGCTGCGTGCAGAGAGGGCTGGAGC  
TTGCGCTTTACCGTACGAACCTGCTTATATGGTTGAGCTCGACTGTGCAAGCGATGTCTATGCTGCTAGCACGTAAGGAGATAGATCG  
CAGTACCGTGTGCTCATTGAGGAGATTCGAAGACTAGCACAAGATGCTCGTAGGGAGATTTTTTTACTCTTATTAGTTCGCTCGCAGAATAA  
GGTTAGTTCATCGCTTCCGCGGTATGGACGTGTACACCTGCACTGTAGTTGGCTGTGCTCGGGGCTGGACTTTGTTGTAACCTTTCCGA  
AGGCTGATAGCCTCCTTGGAGTAAAGAAATCTCCTTTTACCCGAAAAAACAACGCGCACATGTGACGAGATGGAAAGCCGCGCGTCCA  
TGCCACGGGGTGTCTTTCGATCCAGGGCAGGCGGCCACCATGCTCTGCTCATGTCAGCACATCACAGCACGCACATGGCCAAGCACGTAT  
CGTCAAACGCTGGCGGCTGCGCGCCGACGCGGCGACTGCATATGCTGCTCGAACTCCGCTGCTGCATCCAAGCTGTTCCGAGAAATGCC  
CGTCCGCTGCTGATCGATGCATGCACGTACGCATCACTGCTGAATCGATGCACTCCCGGAGACCAAGTACCATACAAAGAAAAGGAA  
AGAAAAAGACATACGTAACCGTACAAGCTAGCTTCAAACCTGCAGTGTGATGCTTCCGGCTGGATACGAAAGCAACTGGAGTACGCT  
CGGTGGAGCAGTTTCTACGCACTCGTCCGAGTATGCAGTGCAGGCGCGCTGCAGCTGCGTAGGGGAGGAAACAAGCCGATCGATACGAC  
ATCGCTATGGCATTCTATGATAATGGAATACAAATATACTTCCGACAGATAGAGCGGGATGGTCCGCGGTCAGCTCGGTTGCTG  
CTCGAACCCCTGTCGGGACTTATATTTTTGCTGAAACCCCTCAGTATTTCTTCTCAGCACACTGACAAGACAGGACCCACATATGTG  
TACACCGACATGGCCATAATTAATTTCTGCAAGTCAATAATCCCGACTCCTTGTGCCATACCAAAATCCCTCTTAAATCGGAGTGAA  
GGTTCAATTTAGAGCGGATCAAAGAAAACAGGGTACAAACTTCAGAGATTTGGACGTGAGGGTCTGTTTTAAACGAGATCTATAACATTAAG

GTTTAGATCAGACTTGACAAATATGCTTTGTGTAAGTTGCATGTCATATCTTATTGCTCTAATATTTGGTCAAAGTTAGCCTCGAAAAATGCA  
TTAGGCCTACAGACGAAAGGAGGAGTAAACCTGTAAAGAGTAACCTGACACCCTCAATATTTGGTCGCTGATATACCGAATGTGTTTTC  
TTGCCATCGAACTGTTTCTCATAAAATCTTTTCAAACACCGACCAAGAGGCAAAACCCGACGCGGCGCATCCCGGGCCAAAAGCGGGAC  
GCCACATGACGAGACGGCTCGTCGGCTCCATTCACCTCGTCGTAACCGGGAACCGCTCCATGATCACCCTGGCAATCAGGGATAGCTG  
GACCTTCCAGTCGCTCCACCCTCCAACTAAACCCCGTCACGGCAGGAGCGGCAGCGCCACGCGTCCCTCTTCTCCACCACCC**CAC**  
**GTG**TGCGTCGAGGTGGCGTCGCTCCCGTCTGCTCCGCTTATATCCATCCTCAGTCGACCAAGGCTTTCACCATCCACACACAGCAT  
TTAGCGATCGAGCAACAAGCAATTTCTGTCACAGTATCAAAGAGTCTGAGATCGCTAGTAGCTGCACCGACGTACGTGCGAC**ATG**

Barwin-like (NCBI accession no. XP\_020147546.1; IWGSC accession no. TraesCS2B02G581900.1)

AGACATATTTTTGCTCATTTGCATGGTAAACACTTCTTACAGACTAAACAACCTGATGCCCGAATGCTCCACCTACCCGCAACATGACGAC  
CAACGCACCTTCATCATGGCATAAAGACATCTCTATGCAGAAGCCACCAACAGCGTCACTAATAGATAACAATGAGCTGGATCTGGTCGAAC  
TAGTAATATCTGGTCCCGGTGACGCTGCAGCAACCAATGTGAGCAACAGCTAGCTCGTGGGGACGAATCTCCAGAGAGCCAAAATGGGG  
GCACCCACCCGAATAATTTGGGATGAGCTGCGGGCAGGAGCACCAGGCTTGGCGCCGACGTTGTTGCGCTTCCACCTGCTGGAGACACA  
AACAAAGGGAACAATTCACCATCGGCAGTTGTCACCGGGCAGGAGGGGCATGCCCTTCCACCGCGAGACACTCCCGTCGCATCAAC  
GCGTGGGCTTAGCCCAACGACTTCTCCGATGACAGTGTGAGAGAAGGAGGCAAGGAAGTGGCCTGGCAACTCGATCAAGGGTATGCCTA  
TGTCGTTAAGAGGCCATGAGGGAACAGCTCAGGGGTAATTAAGGTTTATAGATCTTACAATATAAAGTTGAAGACGATTTGTGGACCCA  
GGGACGGGAGACGATGATGACCCATGATTCATCAAGATCCGAAAAGTGGTTTGTGGTTTGGCTTAAATTTGTGATGCATGCAACT  
TTTTGGTACAACTTTTGGCATAGGCCACATGCCCATCCATCCACCTCCAATGCTTTTCATTTGTACTTGTAAATTTGAATCTATTACATC  
TTTTGAATCAAAGTTCAATTTATATTTTCGTTGCATATTCATGTCCTTGTGTCGAAAGCTTTGAAACAAGCCCTTTTGAATACGTTTTG  
ATAAATCTCAAACCTAAATGTTGATTTCAACTACTAAACCTAAATAGAAATGAATGATAAAATTTAGCAAGTTTCAAAGACTAAACCTGAAACCC  
TAAGCCCTAAGCCGAAGTCTAAACCGTATACCCCTATCAAATGTAACCTGGTGAACCTTATGATGATTTCTAGTTTTAATATTTGAAAC  
TTAATAAATAAATAAAGATATATAAATGTATTTAAATTAATTTTGTTCAAAAGACTTGTGCAACGACACGAATATGCAACGAA  
ACTTAATTTAGACTTTTGCTCAGAAATACAATAGATTTAAATTTTGGATAAACGAAACACATGAGAGTGGGGTGGGTGACTCATGC  
AGCTCTGCCAAAAGTGGCAAGCATGGACCCAGTACGGCGATTAAGAGCTAATGACATAAACTATCTAGTAAACCAATCTAAAGCAAATG  
GGTTGCCGATGCCCTTTCGCCCTGGTGGATTTTTCGATGTGAAGTGTGGGTATACAAAAAATGCAGCGGAAGCATCTATATACTATATAA  
TTAATTTGTAATCTAATTTGTGATTTATATGTCGAGTAAATTTAGAAATGATGAGGTCGGTTTTGTTTTGCGTTTTTTCTTTGGACTTG  
TTCTAGGCGATTGGTGTGTCGGTATCTCAATGAATTTGTGAGAATCTATCTCATAACAATAAATCAAGCTATCTTATCTAAACTTCAAT  
TATGCGCAAAGATATATCTCCCTCTAGCTTTCGAC**CACGTG**TTTGGCAATTCAGCGCATAAATTTGTAGAAAGTACACGCTGACATGAT  
TACATAGGCATCCATCCACACTTGTAAACAATTTTGCCTAATTTTCCAGCTAGGTAGCAGGA**CACGTG**TGCCACAGCCCTTAAAGCATATCT  
GCACATGCTTATGAGCTGTTATGCAATTTGATTCCTAGTTTGTAGAAAATTCGTGGAGGCTGCGAAGAGAAGAAAGTCTACCATCACCG  
TATCATATATTAATTTCCAGCGTTCCATTCACCTCTATATAAATAAATGGTAGTGGCGAAGAGCGACTCCCATTCGAGTGTGACACCTGCT  
AGTACCACCTCTCATCTCTGGTACGATCACCCCTCCTGCTGCGTTGACGAAG**ATG**

11 kDa late embryogenesis abundant protein-like (NCBI accession no. XP\_020190115.1; IWGSC accession no. TraesCS5D02G177300.1)

TGCGAGATGGCGATTGGATGGTGTGACACATCTTGTAGCGAGGAGGCTGTTTGGCGAAATGGACTTTGGATTGTTATAAAAATTCAGTT  
TAGACCAATTTCTGTTAAACATAACAATGTTATTTGTGACAACATATGAAAAAATGATTTAGATAATCAAATGATGAGAAATTCCTAA  
ACTTACGTGCGTTG**CACGTG**CACCCTTTCCAATTTGAAGGGCTGCTTATCGGTTTTAAATCTTGAAGTTTGCACGGTCACTAATATGACCAT  
GCTATTTTAGAGTGATAACCTTCATTTACAGCAGTAATGAACTTGAATGCCAGTTGACTAACAGTAATAAACACCAAGAATACTAGTTGA  
TGTTAATGGGAATTTAGATTAGCGATGATTCATTTTATGCTCTGGTGAACGGGTCAAGCCGGTTTGCAGCGTGGATTTGCGGTTACTTA  
TTTTACTACTAACTATATATTTGTTTGTGCAAGGATGGATATGAGTTGAGAAAGTAGTTTTTATTATACTTGTCAAACATCGTGGGAATGA  
AGCTAAAGACAACTTTCCGTATATTTGTGAAAGAATTTCTTAAAGCGTATAACCTAGATATTAATAATTTTATAATAGATGTTTAGTTGAACT  
CCATTAAGTTTGTGTAACAGGACATGCGGTTAATTTTTCTTTGGCAATTTAAAGTTCATAAATGTAACCTTAAATTTAATAAATTTGTGAT  
GTGTTATATTTGCTGTACGTATCAAATTTAGCATGCATTATCTTTATATACTTGTCAAACATTTCAAGAGCCCGTGGCAACGCACGGGC  
ATTGACTAGTACTAGTATTTGTCAGCATTTCTTTACTGCAAAATACCGGTAAGGCTACTAGTCGATGATTGAGAAAGAAGTTGGCTAAGAG  
CAACTCCACTCGTTGCGCCCGCAGCGACGGCCGGCGGTTATTCAGACCTTCGCCCGGCGCTTTTTAGGCCCTGGGGGCATCTAGGTCCC  
AGCCACGCCCCAGAGGCCGACCCCAAGACGTTTAAATTCAAACCTGACATTTCCCGCTACCCAAAAAAGCCACAAGTCCGGCGATCACCAT  
GCCACAGTTCGGCGATCCGACGCTTTGCTGGTCCAGGGAGAGCGTCCGGCCGCTGGCCGCTGGCCGATTCATCATCCCGCGCGAGACGC  
CTCTGCTTGTTCCTCCACCGGATCTGCCCTGCTCCGCCACGGCCCGCCGCCCTGTCCAGGCCCTTTGGCGTTTGGCGTTGAGCTGTTCT  
GCCGCTCGGTTGACAGCCTCCCGCGCTGAACCTTCGCTTCCAGTCGCGCTTTGACATGCCCGGGGCTTGGACGGCGGTGCCCTCTGCT  
TCGGCTGGTGGCTGGCATCGGTAGGGCCCGAGGGCCGCTGACTTCTTCGGCGCATGATGTCGGATGAAGGGGAGAGGGAGAGAA  
TGCGGGGAGAAGGGGAAATGGAGGAAACGAAGGGGAAAAGCAGGGGGATCGCGGGGAAAAGGGCTTCTCTCGCCGACAGAGCGGACC  
CACGAGCCTTTTCGCTTACGGCGCGCCCGCAGCGACCTCCGGGGGCTTGGGTTGACTCGGGTTCGCCAGCTATTTTGGCCCGGCGA  
TAAATGAGTTTGTGGAACGCGACTGGACCGATTTTGGGCACCGGCTTAAAGTAGCCTCTTCCGGCTGGAGATGCTCTAAGTTGAAG  
CTTCTCGTCTCTAACCAAAAACGACCAACTCAAAGAAAACGAAAAATAATCGAGTTGCTGTTACTTTGAGGAATGATTCGGGTTCTAGA  
GGACACGCGTGGAGTGCACAGGCGCCGCGACGCTTCTCCGTCAGTA**CACGTG**CCCTCGCCGACCTGCCACCTGGGACACGTCCTCC  
CGTCCGCGGTACGCATCAGCGCTTACATTCACATATATATACTCTACGGAGTACGTAGTTACCAGCGTAGAACCGCATCGAAGT  
GAAGACAAGAAAACAAGAGATCGACCACCCGAGCCACAGGAGACGCTGAGGTTTGGATTTTGTAGCGAGCCAGAGGGAGGG**ATG**

LEA 3 (NCBI accession no. ALD18913.1; IWGSC accession no. TraesCS1D02G369200.1)

TATCAACAGAGCAATTAAGTGTCAATTCATATTCATGTACATCAGACAAGGGTATTTATAACTAAAATAGCACCTCACATTAAGATCAGTCA  
ACTGCTCTTAAACTAAAATTTAGGGATTTATGTAAGTGTGATCCAAAGCAAGCACTCACCGAGCATGAAATCCACATCTCTAGCAGCCT  
CTACTTCAATCCATGACTCAGTTGTTGGCTGTCTTGACGGCACCACACCTTACAGCAACAGTGAGAGGGAGAACATAAATAAATCA  
AACAAACAGAAAATTTCTCAGATCGGTACAATGTTGTATTAACAGCGCAACACATCAACTTTGAATTTATCTTGTGTTCTTGTCTCGATG  
CCAGCTCTGCTGACTAAGATGTACAATGAAAGAGCAGAAAAATGATCTTAGTTGCGCACAAAAAACATTTGTTGGGTGAAGGAACCTCG  
TTTGGTGAATAGTTACATCTAATAAACAATATCTTCTTAAAGAACCAACCATATTTCTACATACAAAAGTGAAGAGTGAAGATGCTA  
AAAATTCGAAGAAAACAATCTTCTTTCATACATTTTTTTCGTTGGTTAACTTCCATCTTTTTTGTTTTTCTTTATATTTCAAATAAGTCT

AATTCATATACTTCAAAACTTAATTTATGTAATAATTTAAAAATATTCACCATGCATTAATAAATGTTAATGCATTTTGAATATTTGATCA  
TGCAATTTAGAAAATGTTTTACTGATCTGGAGAATTTTGTATTGTTTTTAAATTTATTTTCTCTCTTACCGTTTGTGTCTTAAAA  
AATGTTTCGTGATATTTTCAAATATGTTTATAAAATTTAAATATACGTTTCATGTAATTTCAATAAAAAATGCATAATACCATTCAAAAACCGA  
CTCGTGAATGATATAAAAAACGTCACATGTCTCAAAAAATGTTTCAATGAAATATGACTAGTTTTTATATCATTAAAAAAATGATATAA  
ACATTTTATGATATA**CACGTG**AAACATGTTTTACAACGTTGAAAAGTTTTTAAATGCATGTTTTAAACATGGCAATATATGTTAAACATTT  
TTAATACATGTTGAACATTTTTAACGCGTTAAACATTTTTTAAAGTATGCAAAACATTGCTTTACGTTATATATATGAAATGTCATAGC  
ATTGTTTTTAAATATGTAAGATTTATTAATAATGTCATGTATATATTTTTGATGGATATGAAATATTTTTTGGGAATCACTGAAAGTTT  
TACACTTCATGAATATTTCAAATGTGTGACGAGCATTATGAAAATTTGAGTGAATTATTTTTAGTATTTTACATATTTATATAAATA  
ACATTTTTTTTTAGAAACGTTTATAGATAACAACGACATTGCTTCGGGAGCCACCGTTTCTCTCCAGATGGGCCCTTACATTTGGGCCATTT  
AGGACGTGCTTGAGGCTAGGTGTTCTTTCTGCTCAAATTTTCAAAAAAAGCGAGGCAAAGACACGTCAGGTGTGGAGCTTCAAAATATTC  
TTCTTTCTCTCGAGTTACTTCGCGAGATTTCCAAGAGTACGTATGGTGCATTTTTTTTTCTGTTCTGTTGTCAGTACTACTTCTGAGC  
GAAGAAACGTCGATCTCATCGAATGGAGCGACGCTGCGTTGTTTATTCGTGTGGTTTTCTTTTTGCGGTGAGACAAGCATCG**CACGTG**ACAA  
CGCGCACGAAAAACAAATCACGCCGAGATCGAGAGCAACGTCGACGGATCAGAGACACCGATGCATGCACATGGCGCGACGATGGCGT  
TCGCGTCCATGCTCCACCACCGCGCACCAAGTGTAAATAAATCGACCAGGAGAAAGCCGATCCAACCTGTGCTCGCTGGCACCCTGGAG  
GTGCACCGTAAATTTGCTCGTGTGTCACACGATGCACACCCCTTTACACTTGTATTGTCAGCTTCTTACCCCGCTTTTGGCCTCTT  
CTTCTCCGCGATGGGCTCGGTGCAATCGGTTCCATCTACATGGCAGAGCTTTGCGAACGTACGGCGGGGAGCGGCAACGCGTGTCTCC  
TACGTGGCGGCATGTACGAGCACCGCGCACGTCAGCTGCACAGCTTCTGCTATAAAGGCCACCTGCTCCAACCTCTTACCATATCAC  
AAGAAGCCGAACCATTTCAAAGTACTGTGCGAGCAGAAGCCTAAAGCGAGTGACATTTCCCTTCCGAGCTAGTTCAAGAAACCAAA**ATG**

**Germin-like protein 4-1 (NCBI accession no. XP\_020167477.1; IWGSC accession no. TraesCS2B02G481500.1)**

ACTAGGGTTTACCCTGACCCTCGATCTGAATCCGACGGCCGCCCTTGCTTTTCCGCTGATCAAAAACGATCGATGCGGTTGGGGGCGAGGG  
GAACCCTAGTCAATTTCTCCCGCGCCGCTCGCTCGCTCGCTCGCTCGCTCGCTCGCTCGCTCGCTCGCTCGCTCGCTCGCTCGCTCGCTCG  
GCCACGCTGGCGACGCGACCGAGGGCGGAGCGGCGACCCAGGCGGCACCCGATGAGCCAGGCCCTTCCCTCCCTCTCCGTTTCCAAGA  
GAGACAGAGAGGATCCCCGTTTTTCATTTACGCGAGAGGAAGAGCGCGCCAGATCGCGCCGTTGGCTATCTCTCCGCGTGGCGGCTCT  
CCCTCGGGTGAGCGCGCGCGGAGGATTTGGCCGCGGTGCTCACCTCCCTCCTTTTTTGTGCTTTTTCTTTCTTTTCCGCGAGC  
AATTGCTAGCTCCGTTGGTTCTTCTGCTCCCGCACCTCGGCTTGCCGATGCGGTGTTGGGATCGAGAGGAATAGCGCGCGGCGTGGCGCGC  
TCTTGGCGGTGAGGCTCAAGGCCAAATCCGGTGGTTTACTTTGCCCTGTCTAGGGTCTTGGGGGAGGGAGGTATTTTTCTTTCTGTT  
TTTGTCTCTGTACCGAAATCAACTAGCCGATCTGGCTGATAACCATTGATAGAACCTTGTGATCGGAGTAGGCTAGTAGATCCGGTAACC  
TACCTTCTCTGGTGGGATGAACCTGATCCAGCACCGCCATGGTGTGCGGAGTGTGGCGAGGTTGGTGGCGCGGAGCTTCCCGTCCG  
CTTAGCGCAAACCTTAGATCGGATTTGGTGTATCGGTGGTGTGTTGGTGCACGATCAACCTCGTAATCCGTGCCCGGCGACCCACCTCTTA  
TATTGCGGTGGCGACAGGGGCCCAACCAACCTATTGTTTGGTGGCGCCCGCATCAGGGCGGAGTCAAGGGCCCGGTTTCGACCTGTTGGGT  
CGAACGGGATAGAGATCAACCTAACAATTACATGTCTTATGCTTTTACCCCAATAAAGGTTCCGTTGGCAGCTTACGATAACATCTACATGT  
AGGTATAGAGTACCTACGATTTAGTCCATATCTCAATGCATCACTACGTTTGTTCGAAGAGCAGTTTTGATTGATGAAGAAATCAAAAGG  
ACCATGACTAGCATGGTCTCCAGTAGTCCGGACCAAGAAACTAAGAAAGACGATCAAAGTAGAATCAACATCAGTGCATCAGCTAGCTAG  
TCATCTGCAGATCCGGTGGGCGAATGTTTTATGATGACGCTTACCAGTTGGAGTTTACGACCAATTTTTATTTCTTCCATCATGATAG  
CGGTGTAACATTTGAATAGGACCTCTTCACTTAGGCTTGCTTTGTTTTCTATTTTTCTGTAGAAAGTTGTCACCTATTTGCTCATTGCA  
CTTGATCAACTCCATATAACAATGAATGAAATGTTCTTTATCGAAGAAAAAAGTACCGACTGCAAGTGGCCAGCAACTAGTAG  
CCGGGAATTCGCTACCACGACCTCAAGGCGTTCAATCCCACTATCATACGTTACCGTCTCGAATTCAGCTTCTGCAAGTTACCAGTGGGA  
TCCATGCTGCAAACTAAAACCAAAAAGGAACCATATCTTTGTCAGCTCTTCCACCGAAAATGGTGCATGTATGAATTTCCACAATGGAT  
ATTACG**CACGTG**GTCACCCTGTATAAACAACAGTTAGTGGGCTGTGAGAAATATACGCCGATCATACTGAAGCTAGCAATGTTAGTAG  
CAGTATCGTGGATGCTTACTCAAACACCGGTGATATTAGTGACCGATATAAATGTTGCTAGTGTACCATGTTGTTGGTAGAGCATGCAG  
CTAGCCACTACTCCCGGCCACCTTTATGCTGTATAAATAGGACCCCGATACGTGCTTCCAGCGTACAATTACCAAGCTCAACACACCA  
GCTTAATTTACCCTGACAGACATTTGTTAGGCTTGTGTTAGTGAAGCTAGCTAGGTAAGAAAAAC**ATG**

**Prx113 (NCBI accession no. ACF08092.1; IWGSC accession no. TraesCS2B02G124800.1)**

GCCAGCGCTGTTGACGGCGCGTCCGTTGCGCTCAGACGAAAAACAACGCCGATGGCTAAACTATGCCGACGCTCTCCACGGCGCTCGGC  
ATATGCTCCTATGTCGACGGCTATACCTACGCGACGGTCTGACACATCTACGCTGACGTGATCTACGCGACGGGGATATGCCGATGGCAGC  
CGTAGGCATAGATCTATGCCGACGGCAATGGACCTATGCCGACGGCCCTGGGCCGTAGGCATAGCCCGCAGTCCGGTGGTGTGGATTTT  
TGCCCCAAGGATGCCCATTCAAAATACCAGGATCAAGAGTTATGCTACTTTAGCTTTTGCAGACCCACATGTGATAAATGTGGTTAAAAAT  
GCCAAAGAGACTGATCAGTGTTTTTTGTAAAGATTTAGGCAAGAATCAGTGGTTCTGGCCAAATTCATAAACTGGTGTTTTGTGCGAAC  
CTTGGAACAATATGGTGGTTCTTTTGCATTTCACTCGAGTTGGGCGAGTATCTACGTAGTGCAAAACATCAAGACAAATCCGTTGTTGG  
ATCGTGAGCCAAAGAAAGAGCTTGACTTTTGTAGGAGTCCAAGCCTTTCATATCATGGGATCCATCGGGGAAAGAGTCAAGCAAGAAATG  
TGCTTATATATGCGCTGGACGCCAATAGATCTCATCATTAGAGTGTCTCCAGAGAATGTCATCTCCACAAGTTCAAGAGGGAAATCA  
TGCAACAAGCTCAAAAGAGTAAAACTCCCATATGTGGGACGGGAGACGATAGTGTCTTATTTGATCATGAGGATCCAAGCGTTATCTTTA  
AGGGCTTCAAGCATCTTTCAATTTCTCTTCTCAAGGCTTCAAAGATGTGGTGCATGTCTTAGGCTTATTTCCACGACGCCATAGGGAGT  
CCCAATATGGTGTCTTTGCGCCATGGCTCACGGTGTATGTTGGGAAGCATAAAAATATGGGTCTCTCAGTGACCGGATTTTTCATGCC  
CCACACAGCTTTGTTGGGCTCTTTTCAATTCATACCATGGCCAAATGAAGGCGCAAAGCTCTTACAATTTGTGAGTGTTAGGACGCCAAGG  
CCACCGTACTCTGGGGCGCATACAATCTCCAGCTGACATTTGCGCTGAGCTGATCGTCTTGTGGAGCCGCAAGAAAGAAAGCCCG  
GTCAATTTTGTGAGGTTTTGACCGTGTCTCGGCGGACGATGAGAGCGTGTGGAGTACACCGCTTCGGAGGACACGACCGACTTAAACA  
GCAAAGTTGACCAATGTTAGTTACAGTTTCTGAAAAAATAACAGACGGTGGATGCCGCTCAATCTCCGGTGTCCATCTCCCTAT  
GCTTCAAAGAGCCAGGCTCACCCTCAGCGTCCAGCTGCGGAATGTCGCTGTTGGCCGAAAGGCGACGGGAGCGCAAGATGACTGCGCAC  
CGGTCAAACAGGGTGAATCGCTTGAACAACGCACACATGGCTCCAGGCGTCCCTACTATACTATTTCTGACGTACGTAAGGCCAAACGG  
TTGGTGTCCACGCACACATGGCTCCAGGCGTCCGTGAGCATGAAAGTGTGAAAAAAGAGAGATCGTTCATGTTTTGCATATATCTGCGCG  
ATAAATCCAAGAGAGATCGCTCAAGTTGGCCAGTTGGTGTGGCGGTAGCGACTCAAGCTGGAAGCTGCGCAAGCTAAGCCTTGGATGC  
ATGCGGACCCCTTCTTCAAATAAGCTTGTGATCGATGCCAATATGCCATGTACCTAGCAGATTTGGGGTACCCGATCGAACGGCTAGC  
TATATCGAGCTCTTGCAGCTACCTAGAGACTAACGTTGGACTAATGGGACGTAATATTTGGAAGCTCTATCCCTAGTGGGAGACCGTGGG  
GATCTGGATATG**CACGTG**AGCTGAATCTTTGGCTATAAATATGCATGCGATACACTACTCTTTTCAAGCCACCAAGTCAACCACTCC  
AATAAGAAGTGACGGTAGCTAACC**ATG**

Glutathione S-transferase 1 (NCBI accession no. P30110.1; IWGSC accession no. TraesCS3B02G152300.1)

ACCGCGATCTGCTCCTTCTGGGTGGGGTTCGCGGCTGACGTTCTGTTGCGGGTGGGGTTCGCGGCTGGCGTTCTGCTGCGGGTGGGA  
GTCGCCGACCGCGTCTGCTGCTAGGACAATCGGTGAGGCCAGTTAGTGCTAGCCGATCGATTGGCGAAGAGATCCGAGTCTGGGGAGA  
TCAGTGAGGCCAGGTGCTATTTGGCCATCAATTGGCCAGGTTCTGGGAACGGGGTGGCGTATCAACGAGGTGCTAGGCTGCTAGCTAG  
GGAACTGGATCCTGGAACGTGGAGGAGCAAGTCCGGTATGCTAAGTACTTTAACTTTCTTCTCACATCCACCTGATTCAGATTATTTG  
ATCTAAATTAACCTGCAAAAAATATATGTGTGATATCCATCTACTATAATTGCTTACAATCAAAATATATATGTGATTTTTTTAGTTTAA  
GATTTATATGCACAGTAAATCTGAATGTTCTTCCATGCATGATTTAGTTTAACTTTAAAGAGTTATACTAACTAGTCTTGATAAAGAGATC  
TTTTGGAGCAACACCAAACTCGTGAGGTGTTTTGCTACGAAAGGTTGTGCTATGTAATGATTATTATTAGGATCAAAGTTGTAGGATAA  
ACGTAACCTTCTCGATGATCTTTTATACAACATTTAGTGTAGTTAGTTATATATGGAGAGAGTATTTAACCTTTGTGTTAAGAGTAGAA  
TAAGTTATCCACACTCTAGCCAAACGAACTATTTGGCAAATATCTCGCTAGCTGGTGAGAGCCAGAGCCGTGGAAAGTCTGCTTGTCTATT  
AAGGCACAAGCATCAACAGGAACATTTAGAGCCATGGAAAAGTGTATGTCGCCTACCAATGGGCCAACTGCTAGCGATGTAATAATAGCA  
TCCAAGTTGATTTTTATAGAACATGCAAGGCGTTGGCAAGTGGGAAATGATGATCGCTGGCAAGCTTAACTCTCGGAACCTATAGCATT  
CAACTGAATCAGAACAAAGATTTAAAAAATACATTTCCATCGATAGTGAAAAATTTCAATTGAGTGACAACGAAATCATATTGGAAAT  
GTACATTTACTTGTGATTTAAATTAGAGGCATTTTCTACCTTTTTTAGTTAATAAGATATGCATATACCCACCTTAGTGTTCGAGA  
CAACGAGAGGCACATTTGCTTTTGGTGTACCATCTCTCAAGCCTCAAAATAGTTGTGCGGACACGATTATCTTCCCGGTTGGAATATC  
GTGGCCTGGTAGAGCTAGCGAAAAATCTCCATGTTGGAATATGTCGGCAGCCGGATAGCCGCATGCATGTAAGTCTCTTTTACCTTAC  
ACTTGTCAAGTGACACTGTATGTCGCTACCACTTGTCTAAATCAATGGGCCAACTGCTAGCGACGTAATAGTAGCAAGTTGATTTACAGTG  
TTTTGCTACAGTCTCTGACTTTGTTTCTTCAATTTAGACTAGCTGACTACTGTCGCTTACCTGCCTTCCCTTCCACGTTAGAGGATCCA  
GTTCTGATATTGAGACCTCGACGATGGGAGGAAGGCGCATGCTGTTGGAATAATTTGAATTTCAAAATCTATCTGGGATCATATTGGT  
CCTTACCAGTGTGGGGGCTGTCGGAATTTGGTCCGCGATCTACAAAAGTGAATGGAGGGAGTAGTTGTTTCTCAATCCGTACCAAC  
**GCACTG**TTTTCTAACTAGTACTTACTTCTTCCGACCACAATATGGAATAGAGGGAGTATCGATAAATAACAAAGATGATTACTTACCCGG  
TTTAAATGATTCAAGAGCTCATTTAAATTTGGCACTCATATTTTATATATCTTTTTTGGTAGAAATGAAATAAAGCAGATCTAGACACTAGC  
TAAAAAGTGCATGTAGCTTGTATTTTCTTGGGCCACGCGGGCGGGTGTGGTGTCTCCCTGCTCTGTGTATAAATGGAGATCAACATCCAA  
GGCTCTCCACACACACAGCTACAGAGCAGAGCAGAGTCTTGTCTCAGTATCTGCCTCTCTGCTGCTGTAGAGCATCCAT**CAGGT**  
**GAAGTT**CACGGACAAC**ATG**

Peroxidase (NCBI accession no. CAA39486.1; IWGSC accession no. TraesCS2B02G125200.1)

CAACCGATGGGTACTGCTCAAATTTGCCATGAAATCACAGCAGTATAGGTTGCACTGCTTGGCTCTCGTCTAGTATACATGTCATAA  
GGGTATTTGGGTAGAAAAAGTTTATGCCGGTCCGCCAGGCGAAGGCCATCTATGGCGGATCAAGAGGCTGCAGAGCTAGGCTCTCTTCT  
CGCCATCTATGTTAGTGTACTCTCCAGTCTCTCCCTCCCTCCCTCTCTCTCTCTCTCTCTCTCTCTCTCTCTCTCTCTCTCTCTCTCT  
CAGGACGCCACTACTCCCGAGGACCTGACGTGTTTTCAGGACCGGTTCGCACTCACTCGTACTGCTCTTGGCTCGTCTTCCGCTCCACGG  
GTCCCTGCCAGCGTCCCGCGGAGCGTGCACCCGCTACTCCGCGGACCTCCCTCCGGAAGCGCGTGCAGCCTCAACCCGATGGTCAA  
ATGAAGCTGCAGGACTCCGAACCCAGTCCAGGAATCTTGACATCCATAGGCTTCCAAGTTCCAACGAAAGCGCTCTCCGCTCAGAGC  
CGCCCGTGGGCTGGGAGAGACCATGGCTCCCTTAAATTTTAAACGAAGAATGTCTATCTTACCTCAGAAATTTCAATGGTCAGATTT  
TAATATACTGCTCCCTCCCTGTGAGCAGTATAGGGTACTGTAAAACGCACCTTAGAAGAAGCTTAGCTCTCACCTTAGAGTGGTCCAAATG  
ACCCCTCTGCTCGATCATTTGCACTTGTATGTTATCGCTATGCCTAGCCTTGTATGATCCATGCGTGGTCACTTGTCTGTAGAGATCAGATAGC  
TACTTCAAGGTCGTGAGTTTATCCTTCGGAAGATTAGTCTGTAATAGAACAGGGTTTATGGTAGATCCCATGGTTGTGCTCATGTTGGTTG  
CACCATACACGGCTCAGGTTAGCCGATTTGAACCTATTTATATAGAGGAATAAACTCGCAACTTCTTGAAAAATAAGTCTGTTTCAGGAA  
TCCAAAATCAACAGCAATTCGTCGGCTTTGTCGAAAAAACAATAAATTCGTCGGAGGCATGGAAGCCAAAGAACTCGCTCCGCTCAGGCTA  
CAGATCGGGCCACGTTACGCGCCGCTTAAACGCCGCTCGGTGCTGGCTACGGCTGTGCGGCTCCGTTCCAGCCTCACTATTCCACCGTGC  
GTTTGATAAGGCTCAACCGCTCAAGGCAGCCTTACTACCTCCGTTCTTAAAAAGTATACTTTCAACTTCAATGAGGGTCAAACCTACTCAA  
AGTTTGACCGAGTTTGTGCAAAAAGTATATCAATGTTTACAAAACCAATAGGTGATGATAAAAAATATATATATCATGAATTTAATACTAC  
TAATTTGATGTCATAAATGTTTGTATATTAATATATAAATGCAGTCAAAACATAAAAAATTTGAATTTTCAACAAAGTTGAAGGCACACTCTT  
TCAAAAACGAATGGAGTACTCTCAATGTCCAGCTACCGAATTTGCGGTGTTGGCGAAGGCAGCGGAGCGCAAGATGGCTGCGCACCGG  
TCAAAACGAGCGTGAATCGCCTTGGAAACAGCCGACTCCCACTACTATTGCGACGTAAAGGCCAAACGGTTGATGTTTCAGGCACACATGGC  
TCCAGGCGTTGCTAGCATGGAAGTGGTGAAAAAGAGAGATCGTTCAATGTTTTGCGGATTTTTGCGTGATAAACGCCAAGAGAGATCGCT  
CAAGTTGGCCCTGTGCAAGGAAATTCAGGTGTTGGTGTGGCGGTAGCGGCTCAAGCTGGAAGCTGCCAGCAATACGCCAAGCTGGAAGC  
TCGAAGTATACCAATCGAACGCGAGTACAGACTAACGTTGGACTAATGGGACCTAAATTTTGGATGAGCTATCGCTAGTCGGAGACTGGA  
GCATCTGAAGGT**GCACTG**AGCTAAATCTTTGGCTATAAATATGCATGCGATGCACCACTCTCTTGCAACAGCCACTAAGCCACCACCACA  
CCACTCCACCAGTAAGAAGTGCAGCAGGTAGCTAGTAAGCCGGCTAGCTTTGCTCTTGCAGCTAGCTAGCTAAC**CATG**

Probable xyloglucan endotransglucosylase (NCBI accession no. XP\_020152513.1; IWGSC accession no. TraesCS7A02G426700.1)

ATGATCAACATAATAAAATTTCCATGCTACCTATAAAAAAATTACAGATGAAAAATTAATAAGCTTGTATTGAAAAATATGGAATATTT  
CAGAAAAAATCTCTAAAACAATCAAGGCAACCTTTGGAATTTGTAAATTCGCACATGGCAAAGTTAGAGATTTTTTTGTTGGAAAGATG  
GCAAACTTTAAGAATTTATTTAAAAAATAGCATGTTATGGCTGTATATGCTTGGATGCTACGAGGAAAAAATGTTCTGCTTCCATC  
TTTGTAAAGATGGTGCATATTAAGTTCAATTTTAAATTTTCTCTATGTCACATAAATTTTGGACCATTTTTTGGACTCAATTTTAGTT  
GTTTTGAAACACCTACTCCCTCAGTTCCTAAATATTTGCTTTTTTAAAGATTTCAAATGGATTACCACATAAGGATGTATATAGACATATTT  
TAGAGTGTAGATTCACTCATTTTGTCTCCATATGTAGTCACTTGTGAAATCTCTAGAAAGTCAATATTTAAGAACGGAGGAAGTATTTATTA  
CACAGTTGTCACAACACTTGGGGCATCATCTAGTTTACTTAAACATGGATATACATAGATCCCTATCTAGTAATGGATAATATTTCCCTAATA  
TTTTTAAGGATATGAAATACTTATCTTAA**CAGT**GCTACATGATTTGTTCTCACATTTTTTGTAGTAAGCAAAGTATTTTTGTGATTT  
TTCCCTTACATAAAGAAGCAAAATCGAGTAAGCCAAATAAAAAAATAAATAAAGTTACTTCCGATCAAACTATCAGAGTCAATGCCTTCG  
TACCTTTGAAGTGAAAAATAAATTTCTGGTTTCAATGGATGCATGACAATCAGTCCATTTATTTCCAAATAGGTGGAACCTAAATTAATG  
AACACGTCCTGACCAGAGACGTGGCCCTTGTAGACTTGTATGTCAGCAATTTCTCATCGTTTGTAGTTGTTGAGGAGAAAAATCAAGGCTG  
CTAAAACCTAGATGATACCTCATGAGTGTACATAAATCGGTTGCCCTTCAATTTCAATGAGATTTGTTGTACGAAACATAAATATTTGAT  
AAAAATGAAAAAGTGAATTTGAATATACATATTTATTTATGATTTATTTCTTGTATATAGTTGTAAGATTTATTTGAATGTAAGTACCAT





CGCACGAAGCGGTACACAGCTGCCGAGGACAAGCTTCTTTGCGAGTGTTCGAGACATTGGACAAGACCCAAAGACGGGCGCCGAGCAAAAAG  
CATTTCGACCTTTTGACTCGTGTGCACCOCGAGTTTCATGAGCGCAAGAAGTTTCCACCTTACCAATTTGTGAGCAGCGCGGGTGGGTCTC  
CATTTCGAAGCGGTGGAGGGTGTATCCAAAGAGTGCACAAAGTTTGTGCCACCCTTGAGAGCGTCAAGGCCCGTCCCGTGAGCGGCATCG  
ACGTGCAAGACATGGTATGATGCAAGCAAGCCGCCCTTTTGTGCCATCAAGATCATCTTTTACGTCTTATTTGTCTACTCATCTGCCCA  
TATGCTTGCAAGAAACATTTTGTAGGCATTTCAAGCTTTGGAGGCATTCAGAGTTCAACACAATGGCAAGTGCCTTCAACCTCTCCCATGTC  
TATCGGGTCAACAGGACGAAGAGAAGTCAAGACACAATATGCCCGCTTAAAG**CACGTG**GGGGAAGGGCGCCGTGGAGGATGTTGGGGAG  
GGCGAGTCGGCAGCGCCGGGGGAAGACCAACTCCAAGAAGGAGGACAAGCGAGATGCGACCACCAACCTTGATCGCAAGCGTGGACGG  
CATGATGAATAAGAAGGACTCAAGGGAGGCGGAGCGCCGGCTTCAAGGGCGAGCAAAATGGATGCTTTCATGGAGATCCAAAGGAGGAGGC  
TTGATCTTGACGCCGAGAAGCAAGCCAAAGTGTAGAGATCGAGGCCCAACGCCAAAGCAAGACAAAGACGAAAGAAGTGGCTCTTGAAGCATG  
ATGACCGGGGTGGAGATCATGAAGTGAATCTCAACGCCCTTGTCAACAAGGAAGAGGCCGTGGTTCGAGAAGATGTAGGCCGACATGCTCAA  
GTTCGATGACGAGTGTATGATGGCGTGCAGGGCCATCTTTTGTATGCCGGTAGGTGTGCCGGCATGACCACGGGAGCCCGATGGCGTGGT  
CGAACTCAAGTCCACTATTTTTTGTGTGCTGGCATGTGTGCCGGCGCTGGCGAGTGCACCAGCATGAACTGTGGTATTTTCTGAAGCCG  
GCATTGTATGCCGGCGTGGCATGATGCTGTATGAGACATGGCCGTGGCATGATCGACAGCGGGCTTTTTTTATTTAAAAATGAATACG  
GACATGAAATGAGTCGGCCGATTTGGGCGCATTGCCGATTCAAATACAAAACCTGAGCGGACGCCGGACGTGCGGCCACTCAAACGGACAAAAG  
AAAAACAAAATGCGTCTGTTGAGTCGCCCCATTGGAGTGTCTTACCOCGCAATCCCATTCTTATTCGATCGGCATCTCCTGCGTAC  
GGAAGAGGGCAT**CACGTG**TGCCGGTGTGCGTGCAGCCTCAAGGTGCAAACTCTCCTTCGTAAGCAAGCGGCAGTACACCGGGTCCA  
AGAGCTCATGGCTCATGGCAGCGCCACCGACCCACTGGCCAGCGCCATCGTCTCCATCGGATATTCGAGGCTCCCGGTCATGCTCAT  
GGGGCGTACGTGCGCCCGTGGGCACCGCCATGCAGAGACAAGCCTCCCCTGCGACGAGCAGGCCAAGACACAGGGCTCGTGGCAGTGGG  
CGCGCACGGAATCAACGCACCTGGCGTGCCTGGGCCGCTCCATTGGCCGGGGCCGAGACTGAGATCACGAGCTGCCGACGGCGCACGCT  
GCAGTGCAGTGTAGTGTATCGTGTGGTCCGGTCCGGAGTGGAGAGCATGGCCACCCGCAATGCGTCCAGTGCGAATCCTCACGGGCG  
CGCCATTGGCCACGGCAGGGCGCTGGCCGTGTATGTAGTGTAGCTTCCCGCGCTCACGGCT**CACGTG**CCCCGCTGCCCGCTCGCGCTATA  
TATCCACCGTGTGACGCTGCGCGTTACGACCTCACCGCCACGCTTCAAGGCTAGTGTAGCTCGATCGGTACGGTGAATA**ATG**

Non-specific lipid-transfer protein 4.1-like (NCBI accession no. XP\_020197700.1; IWGSC accession

TraesCSU02G057300.1)

TCGTTTCGATCAAGACAAC TAGCCTCTGTCGACGCTGGCTGGCCATCTTATGTCGCCCTGTTAAAAAATCGTGCTTGTAAAGACTTTCTGAA  
TCTCAGAAATCCGATGTGTTTTACTGGCACGTTCTTTTCCAGGGTCACTGATTGCTGTGCCCTTCTGTAATGTAGAATCCCTAAAAAA  
ATTCAGTCCATATAGTCGAGGCTCTGCAAAATAGCACAAAGACACCCGACTAAAATGGCTCACACTATGCATAGTCAACCCGTTGCTCCTG  
TGTTTCGACCCACGGGCGGCACTGTATTCACCCCTAATTTTTCGAAATAAACGACACTGACATGTGGTCTGGGATGCCGACCATCA  
TTATATTCACCTATTTTTCCCTAATAAATATGCTGACAGGTGGCTCCCGGGTGTCCATGCATCACTATATGCGCCAGGTAACGGTCAACTA  
TGTTGACCGGACAGAAACGCTCGGTTCCGGCATTTTTGAGTGTGCGGGGAGGTGGAGAAAAGTGAAGGATGTTAGTTGTGGGGCAAACTG  
AGGAGTACTAAGCAACCAAGGTATAGGAATAGAAAATAGAAAATCCCTTTTTTATTCATTACCTTTTTGTTTCCAATTTGTCTATTTTACA  
TCCCATCGCTGCACCTCTGGACCTCTTCCATGGTGGCATCGTATAATAGATTGAGATCCTACATCAGTGGCACATAATGAGATGAGTCTT  
CTGTGTTACACCTCTCAAAATCCATCCATATTTGGCATGAGTTTGTAGTATATATACACAAAAATCAACACATATATACCCACTTTTAGTA  
TTTCAGCACATATATAC**CACGTG**CGATGGAATAAAAAATGGTATTTATTTTTTGAAGTAGATAAACAATAAGCTTGAAGTATGACACCAAA  
CAATTTCCAATTACAATCATGGATGAGTAGCTCTAAGTGAACCTCTTAGAGAAACATTGACATATTTCTTTCTTTTTCAATTACAA  
GACAAAACAGAGGACACATTTTTCTCTAATTTCTTTTCAATCAAGCTACTTGTGCAATTCCTACATAGAAATGATCAAGTGAAGGCGACTA  
TATAATAAGATCACAAAATCAAAAGCAAAAATATGAGTTCACAAAACAAGATCAACACATTTAAACAACATCATG**CACGTG**TTAAGGGGA  
GAGGATTTGGGTCGAGGTTGGCGGTTGCTTCCCGTATGCGGATATGCCGTACTCAGGTATGGGTATGGCTTCCCATCCCGTACCCGCGC  
TTACCCACTCGGTACAATTTCTCCATTTATATACCCATGGGTATATATTTTCTCAAAACCTTACCCTAATAGGGTTTTTACCGTCCGGT  
TTGCGGGTTGCGGGCACCCATTGCCATGTTGAGGCATGACACATGTGGTTCGAGAAAACATAGGCCTTATGGTAGTGGCACAAATCCACCCGT  
ATTCGCCTCACCATGAGTATCAGGATCTGTTCCGCAAGGCCGTTTGC AAAATATAGTTGATGTTTTACTTAGTCAAATGACATATATAA  
TAGTTCATTTACTTGAAGACACGCCCTCCGTCCCATAATATAAAATCGTTTTTCAAGCTATGTTAGCTTGAAGAACGATCTTATATT  
ATGGGACAAGAGATTTTCATAGAACTAATCGATATTCAAAATATACGTTTGAAGACGACATCGATGAGTATCAAACCGTACATTTGGC  
ACATTTGCGAATTTAATCTTGAGACAGAATGAGTAAAGTCAATTTAAGTACAGCCCTATAAGATCACATGCACCGTACAGTTTATGTAGTTC  
ATGGTTGAGCTCACTGTCACTCAATGCACTCAACTACACTACTCCAGCAGAGACTGAGATTAGGTAAACCTCTTAGTCCCGTCAATTAATCTG  
CTGTGCACACGCTAGGTCCATCCATGGGGCCAACTCAACATCCAGCAAAATGCATTAAACGACCATCG**ATG**

Non-specific lipid-transfer protein 3-like isoform X1 (NCBI accession no. XP\_020151640.1; IWGSC accession

TraesCS2A02G47700.1)

TATATAAAGGATGGAGGGAAGGTGGCCGGCCCTCATAGTGCGCCCAAGTGTGGAGTCTACTAGGACTCCCTACTCCTAGTAGGATT  
CCACCTCCACATGAAATAGGAAAAAGGAAAGGAAAAAGGAAAGGAAGGAAGCAAGCTAGTCCAAATTCGACACAGTCCATGGGGAAGGGACATG  
GCCACCTTGGAGCCTTTCTCTCTTTCCCGTATGTCCTAATAGGCCCAATACGAATTCCCGTAACCTTCCGGTACTCCGAAAAATACCCG  
AATCACTCAGAACCTTCCGATGTCGAATATAGCCTTCCAATATATCGATCTTTATGCTCGACATTCGAGACTCCTCGTCAATGTCCTCC  
GATCCCATCCGGGACTCTGAACAACTTCGTTTCATCAAAATCACATAACTCTTAATACAAATCGTCACAGAACGTTAAGCGTGGGACCCCTAC  
GGGTCGAGAATATGTAGACATGACCGAGACACATCTCCGGTCAATAACCAATAGCGGAACATGGATGCTCATATTTGGCTTCCACATATT  
TTATGAAGATCTTTATCTGTCAAACCGCATAACAACATATGTTGTTCCCTTTGTCATCGGTATGTTACTTGGCCGAGATGACAGTCACTAT  
CTCAATCTAGTCAATCTCTTACCAGAAAGTCTTTACTCGTTCCCTAATGCAACATCCCGTAACCTCATTTAGTACATTTGCTTGGT  
CAAGGCTTATAGTGTATGTCATTACCAGAGGGCCAGAGATACCGCTCCAATATACGGAGTGACAAATCTAATCTTGATCTATGCCAACT  
CAACAAACACCATCGGAGACACCTGTAGAGCATCTTTATAATCACCCAGTTATGTTGATGTTTGTATGACACACAAGGTGTTCCCTCCGGTA  
TTCCGGGAGTTGCATAATCTCATAGTCAGAGGAACATGTATAAGTTATGAAGAAAGCAGTAGCAATAAACTGAACGATCATTTATGCTAAGCT  
AACGGATGGGCTTTATCCATCACATCATTTCTAATGATATGATCCCGTTCATCAAAATGACAACACATGTCATGGCTAGAAAACTTAACCA  
CTTTGATTAAAGCTAGTCAAGTAGAGGCATACTAGGGACACTCCCATTTGCTATGTATTACACATGTACTAAGTACCAGGTTAATACAA  
ATTCATGATGAATAAATAAATTTATCATGATATAAGGAAATATAAATAACAACCTTATATTATGCTTTAGGGCATATTTCTTCAAGGCA  
TCACAACAATAATACATCAGTGCACCGAC**CACGTG**AGTTCGATCACTTCGGTTTGAAGCAACATATATCAAACTAGTGTGTAACACTCTGAA  
ATTTTAAACCTTATTTAAGTGAGAAGATAACAACACTATACAAAGTTACAATTTCCAGGCACAATTTATGATGATAATATAAATAAAA  
GAAAACAGAAATTAACACGAGGATATATGCTTGATATACACTCCACTTGGTTGGAGTTAAGAAAGCACCGCACATGTTGCTGGCATTGA

TCACCGCACCCTGATCAGTACATATGCCGGTGGAAATTAATACTTGACTAGTCATAGATCCTAACTTTGCTTTCAACGATGCATGGCATG  
GTAGATGCATAGATCGGTGCTACTCAAATTTACTCCATATCGTGTCCATGTCGCCCTCTTTTGTGTTTGACAACGACGGCCACCTACT  
CACCCTGGCCATTCTCCAGATCTGCACACTACACTGTGGACTGTGGTAGCTCGCACACAGGTTCCATACGTTTACACCGGAAGAAATTC  
CGTCGGAATTTTGCAGAAGCTTCTGCTCATACTAATGTAGTAGATGTGAGCACTTTTCGAAAGTAAAAATGTAGATGTGAACAAAGAAGC  
GTACATGCGTGCAGTGCACCGATCGATCCATGATCCATCGTACGGTCCCCAGCGCCCAACCACCGGCATG

Type 1 non specific lipid transfer protein precursor (NCBI accession no. CAH69190.1; IWGSC accession  
TraesCS2B02G501000.1)

GTAGAAAAATCAGGGATTAATAGAATTAATAAATCATAACAGTATGCGTGTCTAGCATACAAGTTAGCAGCGTCTGTGTTTACTCAA  
CACTGCTAGTACAGATATATTAATTTGCTTTATATAGCAGAACAACCTCATATAAGTTACACGATTGGAGATGTAACGTGCAAACTGTG  
TACATTACATGCATGTATCCAAATTTATGTGCACAAAAATAACAACATTAACATGTCTCATTCACACCGGAAACCTTTATGTAACACTTTG  
AAATTTTAACTCTTATTCAAGTGGGCACATAATGATACCATACAAAGTTTCAATTTTCTAAACATCGTTTAAATTTGTAAAAATTCAAAA  
CTATTTAAAAACATGATGTGCTTGAATAATCCCGTACAAATATTTCAGATTTTTTATTAATTTTCATCAACACGACTAAATATACAATATAAA  
ACTTTTATAGCATAAACTTGGAAACGCAAAAAATCCATAATTTGTGCTTAAAAATCTAAATGTAAAAATATACTAGCGCGCTCACGTCCAAGCT  
CAAGTTGCTAGTAGAAGCACTAGCAGCGCGCTGACGAGTAGGGACGCTTCTAATGACCATTGATGTAACATTTTTAATATTCCAAACAAAA  
TTCATATAGTTGATGTGCTTAAATTTTCAATTACTTTTCATCGAAAAACAATAAATGTATGTTAATTTTTTTGGCATATAAAGCCCCATAA  
TCATGTTTGAATTTATGAATGCTAGCATGTGCACACTACTAGAAATACAAGCTAACGTCGTCTGCGTTTACTCAAATGCTGCGAAATACA  
TACATTAATTTCTTTAAAAATAGCAGAACAACCTCACATGAATCTCAAGATTGGAGATGTAACGTGTAATTTGTGTACATTACATGTATA  
ATGTTTTAAGTCATGAAATAACAGCACTGCTATGTCTCTCAACACGACAGTTTCCCCATCGAAACGAATCTCCCATGGATATCGATC  
CCTTCGTTTGGAAACACATATATCAAACTAGCGAGTAACACACTGAAATTTTAACTTATTTAAGTATCATATAACACACTATGC  
AAAGTTACAATTTTCCAGGCACAACCTATGCTTGGCAATAATAAAGAAAAATAGAATTAACACTACGGCAGGAGTATATGCTTGATATA  
GACTCCACTTGGTTGGATTAGAAGCACCACACATGTGCTGGCATGATCACCGCACCGCCTGATCAGTACATATGCGCGTGGAAATTA  
ATACTACTGTTTGTCTTTAAGCATGCATGGCATGGCAGAGGATAGATCGGAATACTACTGTTTTGCTTTTAAACGATGCATGGCATGGTGG  
AAGGATAGATCGGTCGACTCAAATTTACTCCATATCGTGTCCATGTCGCTCCCTTTTTTGTGTTTGACAACGACGTTCTACCTACTCAC  
CACTGGCCCTTCTCCAGATCTGCACACTACACTGTGGACTGTGGTGTCTCGCACACAGGTTCCATACGTTTACACGCGAAGAAATCACGT  
CGGAATTTTGCAGAAGCTTCTGCTCATACTAATGTAGTAGATGTGAACACTTTTTGAAAAACAATATATGTAGATGTGAACAAAGAAGCG  
TCACATGCGTGCAGTGGAGTGGACGCGCGGAGCGATCCATGATCCATCGTACGGTCCCCAGCGCCCAACCACCGGCATGCGCATGCATGCA  
TGCCCCACTGGCTACGTACGACGTACCGCATGGACACCTGATGATGATGATGATGATGATGATGATGATGATGATGATGATGATGATGATGAT  
CTTCTTCTGGCCATCTCTCGCCCGCCGGCTATTTATACCAGCTCCACGGAGTTCCAATCCAATCTCCACAAGCGCCATCACACACAAGCT  
AATCAAGGCTCAGTCTCTCCGAGCTCCACGATTTCCAGCAAGCAAGCGGAGCACTAGATCTCGATG

Short-chain dehydrogenase TIC 32 (NCBI accession no. XP\_020201268.1; IWGSC accession  
TraesCS3D02G077500.2)

TTGCATATGGAAGCTCCACGGAGAATTTGTTGATGTGGTGTCAATGAGAAATGACACCTAGCTTGTGGATCATCGGATACGGGCCCTCT  
TCGATTCAAATAACTTTTCAAGGTTTTTTTTGAGAATTTTCATCCTTAAAGAAAAAATACATGTCGGTAGTTTAAATATATGATCATAAGG  
TACAGGAGATTTTTGTGCTATTTGCTAGATTTCAAGGAAAATTTTCATCCACTCTGGCATGTTGAGAAATCGTATGTTTCCCTTATCCCGT  
GTGTTAAATCTGTTTAAACATGAAGCGACATGATCGCACATGACCTGTGCTGGTCCCTCTTTTTTGTAGTACAACTACATTTGATTACC  
CATTTTGCAGTACTCCTAATACGTTTCGATTTGTGGCATGTTTGTGATTCAAAGGAATAGTGCATGATATTTGAAGAATTTGAATCCATGGGAA  
TTATTCATGTGGATCGTTTATTATAGAAACGGAATTTTCATGACCTATTTGGATTGAAGAACTTTATAATTTTCTTAGAGGATTTTCAT  
TTCATGCGAATCTTCCATATTAACCAATTTGAATCATAGGATCCTGGCCACTTAAATGCTTATGGAATCATTTGACCTGATGATGATGAT  
TTGGATCATAGGAATTTCCCTAACTCCCTAAGGAATCATATTTACTCTATTTTGGAGAAAAGTTTCCATCCACTTAGGACCCATCTGGTTT  
ACATGATTTTTGGAACATGCAAGCATGCGTGTTCAGTCAATAGCACAACCTAGCTTCGTCATGAGGCAAGGGAGGTGAAGAACAATGCAAA  
TCCTTGATATGAGAATGGTATGTTGGTAGTGCTTTTTCTTTGATTAATAAGATATATAACATGGGATGTGTCATGCACGCTGCCATATT  
CATTTGTGTCAGAAGATCATATCTAGTTTGTGCTCACCTACTCTCATTTCAAAGACAGGAAGGAGAGAATATATAAGCCTTTATGCAATTA  
TTTGTCCATCTCTTCTCACATATATACTAGAGATGGCGACAGTGCAAACTAACAATATAGTTAGAAAGTTACAACCGCAACGACTTT  
CTCATGCGAATCTTCAAGAGAAACCAATACCTTCTACATAGTTGGTCTGAGTCTAGAAATAATTTATGGGAATGAGTGGCAGCGCAACCTCT  
ATTTGGATGCCCTACATGTTAGGGCACCATCTCCAACCTCATGCAATCCATGATCAATTCGCCACATAAGCAAAGCACACACAGTAATAT  
GTGTGCCACCTTATTGCCATGGAGATAGTGTGCACCATCTAGTCTTTCAGTGTGGTGGGTTGGCGCTTCCATCAAGAAAGCCCTGGAGGC  
AGTTCAACGCATACATTTGTGATCCCTCTATGTCTCGCAGCGACATTTTCAGCAATCACTATTAGACAGAGCGCACGCAACATGTCTCTGC  
ATCCTATGATTTCTACGCGAGAACAGTATATCTAGTTCGCAAGATGCAACTACATCAGTAGATCAACACCGTTGACCGTAGCTGTTGAG  
AGGCAACACAGTACACTATCTTACACCAACAATCCTTTGATTTTTGAGAGAGCTCGATCCCTGACTTTTATTTCCCGATTATTTGTAAC  
TACTCCCTCCGTTCCATAAATGTAAGCTTTTGTAGAGATTCTACTAGATGGACTACATACGGAGCAAAATGGATGAACTCTACTTAAACCGC  
ATCTATATACATCCGATGTGGTTCATAGTGAATCTCTGCAAGACTTATATTTAGGAACGGAGGGAGTATATGTCAACTATCTGAGAATA  
GAGTCTTATTATGTCAAAGCAAAAATGCAGCAGTTGATCAACACCTGACTGTGACTCTTCTCCTCTGGATTTTCAGATTTCTCTCTAGG  
AAAAGAAGATGCGATTTTTTGTCCAGTGCAGAGACCAACACATGCATATTTCTTCCCGTGAAGAAAGGAATCCAGAGAGGAAACCTGT  
TCCATCGGAATAGTAGAGTCCCGCCCGCCGGATTCACTCGAGAGTTTGGCTTCCGGCCGGTAGCCTGCCCCGACCGCCTACTCCCCAACCA  
AACTGCTGCTACCGCTCCCGCGGCCATAAATAACCTCCTCCCTGCGCCGCTCCTGACCGCCTGCCTCCTCCCTCCTCCTCCTCCTCCT  
CGCGATCACCGGAACCAATCTCGCCATCGCCTAATCCGTCAGGTCGCTCAGGTTGAGTTTCGCCAAGATTTCTGCTTCTTCTCCTTCTT  
CTTCTTCTGATTTGGGGCTCACATTTCTGTTCCGAGTTTTCAGGAGTTCGCCCAAGAACAAGATG

Type 1 non specific lipid transfer protein precursor (NCBI accession no. CAH69206.1; IWGSC accession  
TraesCS3B02G063500.1)

TGGAGATGCTCTAATGACGCATCCATCGGTAGTAGTAAATCATCATGAGACATGCTGCTACATTGACGGATGAGGCACTTACCATTAATAAA  
AAGCCGAGTGGACTATGGCACTGAATACTTGCACAGAGGCAAAATTAACATCTATTCACTCCAGGTGAACCAAGGGGACAGTGCATTTGGTG  
CTGAATTACAAGTCTCCCAAGTGCACATTTTTGCTCTGTGGTAAATTTAGAATGTGATTTTGTAAAACAACCTGAAAAATATATTAACATAAGAAT  
ATATTTATATATGCATTTAGATCAAATATCGTCCGTTTTGTACCAACTTAGTTCATTGATATATTACTAGAGTTAACGTTGAACGATCAAA

TTTCGTTTCTGAAGGTGGTGCACACAT**CACGTG**AACGAAAAAGACAGGCAAGGGTATCTTGTGAGGAAACAAGAGATAGTGTTCCTTTGTT  
TTCTCTTAGAACAAGACTGGCAATGGCGTTCCCCAATAAATTTGTAACAACAAGAACAACAACAATAATAATGACTATAATAGTAAC  
GACGACCAAGAAGATGATGGACATAAAGGTCTTAACATGAACATGTGTCCCTTTTGTGTTTTGAGTTGCTAGAAATCGTGAGATCACCTTCGG  
ATAAAACATGCATGATGTACAAATAAAAATTCGAAATGTAGCTCTGAATATGGTACCAATGAATGTTAAGCTGTGATATTGGGACCAATAA  
GGCAAGGTAGATGATCCCCAGGCATGCATGACCACATGCACAACCTAGATTGATATAGTTCACTTGTTCGAGCTCACCATAAATTAATGCACTCA  
ACTACCGAAATCACTGATTAAGAGTACTCTTTGTAATGTCACTCACACCTTCCCATAGTGCAACATGTGTTGAACTGCATGTGCGCCACT  
TGTCCGAACCTGGGATTTTTCCCTTTTCGTAGATTTTTAATCAAAAATGTTTTATCTCTCAACCATGTGTCCAAACTACTGAACCATTCACC  
ATTGGATTCCTCGCGTCGAGATCTTCAAACTAGATCGTATGTTGATAGGTTTCGACGAACTTTTTTTCACGAAAAAATCGAACGAAAAAAA  
CCCGAACCGAGAGCACGGTTTTCCCTTTCCAAGAGCATGACCAAGCTTCTCGCGGAAGCAAAATCCGCACCTCCACGAGAACTAAATTAGTGC  
CTCTCGTGAAGGAAAAGAACAATTTTTGTCTTTTTCTGAGAGGCACGGCCGTTCTTGTGCTGGAAGCAAAATCCGTCCTCCACGAGAAGTA  
AATTAGTGCCTCTCATGGTCGAAAAATCCAAGATTTTTCCCTCTCGCATAAGCAAATTTTGACTCCACGAGAAGTAAATCAGTACCTCTT  
GTGGATGAAAAAACATTTTTTCCCTTTCCAAGATGCACGGCTGTGCTTCTATTGGAAGCAAAATCCGGTTTTCCGCTTTGAGCTGAGCTA  
TTGGATTCCGTAGGCCAGAGCGTATTTTGGGTA AAAATGATGATGTACGTATATGCACAGTTCAATGGTCGTGCTCACCATCATAGATGCAC  
TCAACTACTCCATGGTCGCGCACTATATGACTGCGTACATGTCTTAGTCTCATAGTTAATCTGCTGTGTACACGCTAATCAACCACATTC  
CCGCTAGAACGCTGGATGATGTGCTTGGTCCATCCATCGGCCAACCAACGGTAAACAACCAACCATCTCCTAAATGCATTAACACCATA  
AATCAATTC AACATCCAACAACCTAAATTCATGCATTTGCTCGCATCAATTGAATTGGCACACGTAGACACAATACTTGACACCAAGAAAG  
TACTACTGTTTATCCGAATGGAATCCCGTGATGGTAAGAAGCCCTATTTAAGCCCATGCATCCCCACGAAACTCCTCACCATTAACAATCACT  
TAGCAAATCTAGCTATCCCATCATCTCTGCCTGAGCTCACTACCCTACTATTGCTAGCTTGATCGAG**ATG**

**Supplemental Figure S5.** The promoter sequences of the genes encoding the identified proteins with known functions. These promoter sequences (about 2,000 bp) have been retrieved from IWGSC database. The ABA-responsive elements (ACGT) in each promoter are labeled with red color, and the start codon (ATG) of each gene is highlighted with black bold words. Accessions of proteins in NCBI and IWGSC databases are listed. Promoter sequences of the genes encoding dehydrin DHN 3, putative chlorophyll a-b binding protein 1C, and insulin-degrading enzyme have not been found in these two databases.
