# Supplementary material for: Functional characterization and regulatory mechanism of wheat CPK34 kinase in response to drought stress
Source: PubMed Central journal article supplement (PMC7444251; doi:10.1186/s12864-020-06985-1), 2020-08-24
Supplement: 12864_2020_6985_MOESM2_ESM.pdf [file 12864_2020_6985_MOESM2_ESM.pdf]

**Supplemental Table S1.** Meteorological parameters (rainfall, temperature, etc.) after anthesis in the experimental field.

| Date(year-month-day) | Sampling Timepoints | Temp. min. (°C) | Temp. max. (°C) | Weather    | Rainfall (mm) |
|----------------------|---------------------|-----------------|-----------------|------------|---------------|
| 2015-04-22           |                     | 27              | 14              | Cloudy     | 0             |
| 2015-04-23           |                     | 29              | 15              | Clear      | 0             |
| 2015-04-24           |                     | 28              | 14              | Clear      | 0             |
| 2015-04-25           |                     | 29              | 17              | Cloudy     | 0             |
| 2015-04-26           | 5 d                 | 29              | 18              | Cloudy     | 0             |
| 2015-04-27           |                     | 30              | 18              | Cloudy     | 0             |
| 2015-04-28           |                     | 31              | 16              | Clear      | 0             |
| 2015-04-29           |                     | 28              | 16              | Clear      | 0             |
| 2015-04-30           |                     | 29              | 17              | Clear      | 0             |
| 2015-05-01           | 10 d                | 27              | 16              | Light rain | 4.2           |
| 2015-05-02           |                     | 25              | 15              | Overcast   | 52.6          |
| 2015-05-03           |                     | 27              | 17              | Cloudy     | 0             |
| 2015-05-04           |                     | 24              | 15              | Cloudy     | 0             |
| 2015-05-05           |                     | 27              | 17              | Cloudy     | 0             |
| 2015-05-06           | 15 d                | 24              | 14              | Light rain | 0             |
| 2015-05-07           |                     | 26              | 15              | Cloudy     | 17.1          |
| 2015-05-08           |                     | 26              | 14              | Cloudy     | 6.2           |
| 2015-05-09           |                     | 24              | 13              | Cloudy     | 0             |
| 2015-05-10           |                     | 22              | 11              | Light rain | 1.1           |
| 2015-05-11           | 20 d                | 24              | 14              | Clear      | 1.1           |
| 2015-05-12           |                     | 29              | 15              | Clear      | 0             |
| 2015-05-13           |                     | 32              | 18              | Cloudy     | 0             |
| 2015-05-14           |                     | 27              | 18              | Cloudy     | 0             |
| 2015-05-15           |                     | 26              | 16              | Clear      | 0             |
| 2015-05-16           | 25 d                | 28              | 19              | Clear      | 0             |
| 2015-05-17           |                     | 28              | 19              | Cloudy     | 0             |
| 2015-05-18           |                     | 32              | 19              | Clear      | 0             |
| 2015-05-19           |                     | 31              | 18              | Light rain | 0             |
| 2015-05-20           |                     | 27              | 16              | Clear      | 0             |
| 2015-05-21           | 30 d                | 24              | 17              | Overcast   | 0             |
| 2015-05-22           |                     | 27              | 17              | Cloudy     | 0             |
| 2015-05-23           |                     | 31              | 18              | Clear      | 0             |
| 2015-05-24           |                     | 31              | 18              | Clear      | 0             |
| 2015-05-25           |                     | 31              | 19              | Clear      | 0             |
| 2015-05-26           | 35 d                | 28              | 20              | Cloudy     | 0             |
| 2015-05-27           |                     | 31              | 19              | Clear      | 0             |
| 2015-05-28           |                     | 31              | 21              | Cloudy     | 0             |
| 2015-05-29           |                     | 25              | 18              | Light rain | 0             |
| 2015-05-30           |                     | 31              | 21              | Clear      | 0             |
| 2015-05-31           | Harvest             | 32              | 23              | Cloudy     | 0             |

Notes: This table lists the meteorological parameters during the wheat grain filling period (from 22 April to 31 May, 2015) at the Experimental Farm of Agricultural Faculty of Henan Agricultural University. After from 6 to 31 d May, 2015, corresponding to 15~35 days after anthesis, there were only 25.5 mm rainfalls in this experimental site and this rainfall amounts are inadequate for the growth of wheat plants, indicating that there occurred drought stress during this period.
