# Supplementary material for: Functional characterization and regulatory mechanism of wheat CPK34 kinase in response to drought stress
Source: PubMed Central journal article supplement (PMC7444251; doi:10.1186/s12864-020-06985-1), 2020-08-24
Supplement: 12864_2020_6985_MOESM6_ESM.pdf [file 12864_2020_6985_MOESM6_ESM.pdf]

**Supplemental Table S5.** Primer sequences used in this study.

| Primer name          | Primer sequence (5'-3')                                            | Usage                                     |
|----------------------|--------------------------------------------------------------------|-------------------------------------------|
| <i>TaCPK34</i> -CDS  | F:CCCCTGCATTCTTGACCT<br>R:ATCGCTTGCTGTTCTGTT                       | Amplifying ORF fragment of <i>TaCPK34</i> |
| qPCR                 | F:GCCAAGGACCTCGTTAGAAAGA<br>R:TCTTGAACATCTCCTTGAGCCC               | qPCR of <i>TaCPK34</i>                    |
| <i>TaActin</i>       | F:AAACGAAGGATAGCATGAGGAAGC<br>R:AGCGGTGGAACAACCTGGTA               | qPCR of <i>TaActin</i>                    |
| <i>TaCPK34</i> -VIGS | F:CCTTAATTAACGCACCATCGTCGAGATCA<br>R:TATGCGGCCGCCCGTAGTTCCGCTTCAGG | Construction of VIGS vector               |

Notes: *TaCPK34*-CDS, primers are used to amplify the coding sequence of the *TaCPK34* gene; qPCR, primer are used to measure the transcripts of the *TaCPK34* gene by using qPCR method; *TaCPK34*-VIGS, primers are used to amplify one fragment (219 bp) of the *TaCPK34* gene for construction of BSMV-VIGS-*TaCPK34* vector.
